# Supplementary material
Source: PubMed Central journal article supplement (PMC1635108)
Supplement: pnas_0604493103_2.pdf [file pnas_0604493103_2.pdf]

**Table 1. Distribution of human cells in CD34<sup>+</sup> cord blood cell-transplanted mice**

| Days post infection | Not infected |      |      |      | YU-2-infected |      |      |      | NL4-3-infected |      |      |      |
|---------------------|--------------|------|------|------|---------------|------|------|------|----------------|------|------|------|
|                     |              |      |      |      | 15            | 15   | 22   | 23   | 15             | 15   | 22   | 23   |
| <b>Blood</b>        |              |      |      |      |               |      |      |      |                |      |      |      |
| ● CD45              | 75.9         | 37.2 | 12.4 | 5.3  | 18.7          | 4.8  | 3.5  | 29.3 | 5.3            | 4.9  | 5.2  | 43.1 |
| * CD4               | 52.2         | 43.1 | 12.0 | 21.1 | 7.1           | 5.1  | 8.6  | 12.7 | 14.7           | 11.7 | 36.0 | 38.3 |
| * CD8               | 31.2         | 44.2 | 8.2  | 8.3  | 6.5           | 3.4  | 2.9  | 9.5  | 8.1            | 5.2  | 20.9 | 46.7 |
| * CD19              | 10.4         | 8.9  | n.a. | n.a. | n.a.          | n.a. | n.a. | 62.6 | n.a.           | n.a. | n.a. | 4.6  |
| <b>Bone marrow</b>  |              |      |      |      |               |      |      |      |                |      |      |      |
| ● CD45              | 89.9         | 45.7 | 20.2 | 4.9  | 52.5          | 38.3 | 22.1 | 22.0 | 8.4            | 34.4 | 1.4  | 82.0 |
| * CD4               | 32.2         | 15.3 | 2.0  | 8.2  | 7.9           | 5.1  | 6.4  | 4.4  | 3.9            | 4.6  | 32.4 | 47.8 |
| * CD8               | 34.7         | 5.6  | 0.7  | 1.3  | 0.2           | 0.3  | 3.2  | 1.7  | 0.6            | 0.1  | 27.0 | 25.1 |
| * CD19              | 25.5         | 52.4 | n.a. | n.a. | n.a.          | n.a. | n.a. | 59.1 | n.a.           | n.a. | n.a. | 9.7  |
| * CD34              | n.a.         | 1.2  | 7.4  | 2.9  | 16.0          | 12.3 | 12.4 | 4.0  | 2.6            | 11.1 | 1.3  | 10.4 |
| * CD123             | n.a.         | 7.7  | 1.0  | 1.1  | 2.6           | 1.2  | 1.4  | 7.8  | 1.5            | 1.4  | 2.6  | 1.3  |
| * CD11c             | n.a.         | n.a. | n.a. | 2.9  | 8.6           | 4.4  | 8.1  | n.a. | 3.2            | 5.1  | 27.8 | n.a. |
| <b>Spleen</b>       |              |      |      |      |               |      |      |      |                |      |      |      |
| ● CD45              | 93.2         | 55.8 | 28.0 | 24.0 | 27.6          | 17.1 | 22.5 | 26.0 | 22.2           | 19.0 | 6.9  | 10.1 |
| * CD4               | 40.6         | 22.0 | 4.8  | 7.1  | 4.8           | 1.4  | 1.7  | 6.8  | 5.5            | 3.5  | 12.0 | 32.9 |
| * CD8               | 19.2         | 30.2 | 4.8  | 5.3  | 4.0           | 1.0  | 1.8  | 5.3  | 4.7            | 2.4  | 21.5 | 50.0 |
| * CD19              | 32.3         | 36.7 | n.a. | n.a. | n.a.          | n.a. | n.a. | 73.2 | n.a.           | n.a. | n.a. | 8.5  |
| * CD14              | 0.2          | 2.5  | n.a. | n.a. | n.a.          | n.a. | n.a. | 5.4  | n.a.           | n.a. | n.a. | 1.0  |
| * CD123             | <0.1         | <0.1 | 0.8  | 0.3  | 0.5           | 0.8  | 0.4  | 1.0  | 0.5            | 0.6  | 1.6  | <0.1 |
| * CD11c             | 6.9          | 6.7  | 1.4  | 1.6  | 3.6           | 0.8  | 1.1  | 7.1  | 1.6            | 1.1  | 6.7  | 6.2  |
| <b>Lymph node</b>   |              |      |      |      |               |      |      |      |                |      |      |      |
| ● CD45              | 94.8         | 88.7 | 81.8 | 74.8 | 91.0          | 60.5 | 71.7 | 86.6 | 86.8           | 74.4 | 66.6 | 89.7 |
| * CD4               | 75.5         | 39.5 | 30.3 | 31.2 | 27.7          | 42.1 | 36.3 | 29.3 | 44.1           | 38.6 | 7.3  | 6.3  |
| * CD8               | n.a.         | n.a. | 33.3 | 32.8 | 33.7          | 30.9 | 14.4 | n.a. | 24.7           | 28.8 | 43.7 | n.a. |
| * CD123             | 1.5          | 3.2  | n.a. | n.a. | n.a.          | n.a. | n.a. | 0.2  | n.a.           | n.a. | n.a. | 7.1  |
| <b>Thymus</b>       |              |      |      |      |               |      |      |      |                |      |      |      |
| ● CD45              | 92.3         | 82.5 | 95.7 | 94.9 | 94.1          | 98.2 | 93.6 | 98.1 | 99.0           | 97.3 | 94.4 | 87.4 |
| * CD4 single pos.   | n.a.         | n.a. | 21.0 | 44.2 | 26.0          | 13.9 | 42.1 | n.a. | 33.3           | 11.5 | 44.7 | n.a. |
| * CD8 single pos.   | n.a.         | n.a. | 18.7 | 14.3 | 31.4          | 6.8  | 13.1 | n.a. | 4.1            | 8.4  | 32.4 | n.a. |
| * double neg.       | n.a.         | n.a. | 16.1 | 9.3  | 19.9          | 5.5  | 6.6  | n.a. | 3.7            | 10.4 | 8.8  | n.a. |
| * double pos.       | n.a.         | n.a. | 44.2 | 32.2 | 22.7          | 73.8 | 38.2 | n.a. | 58.9           | 69.7 | 14.1 | n.a. |
| <b>Liver</b>        |              |      |      |      |               |      |      |      |                |      |      |      |
| ● CD45              | n.a.         | n.a. | 67.1 | 36.6 | 77.6          | 33.7 | 26.5 | n.a. | 48.2           | 41.5 | 31.4 | n.a. |
| * CD4               | n.a.         | n.a. | 30.2 | 28.7 | 35.4          | 16.9 | 25.2 | n.a. | 22.8           | 27.0 | 17.9 | n.a. |
| * CD8               | n.a.         | n.a. | 9.8  | 9.3  | 8.1           | 3.1  | 3.1  | n.a. | 5.9            | 6.1  | 30.9 | n.a. |
| * CD123             | n.a.         | n.a. | 4.8  | 3.6  | 3.5           | 5.8  | 8.0  | n.a. | 2.3            | 5.3  | 0.7  | n.a. |
| * CD11c             | n.a.         | n.a. | 8.6  | 11.1 | 38.9          | 9.3  | 24.9 | n.a. | 11.6           | 15.5 | 5.0  | n.a. |

● Percentage (%) human CD45 positive cells of all viable mononucleated cells

\* Percentage (%) respective cells of human CD45 positive cells

n.a., not assessed. Data show distribution of human cell engraftment in representative mice (mean age, 16.6 weeks; range, 14.6-21.9 weeks) as assessed by flow cytometry.
