# Supplementary material
Source: PubMed Central journal article supplement (PMC1635108)

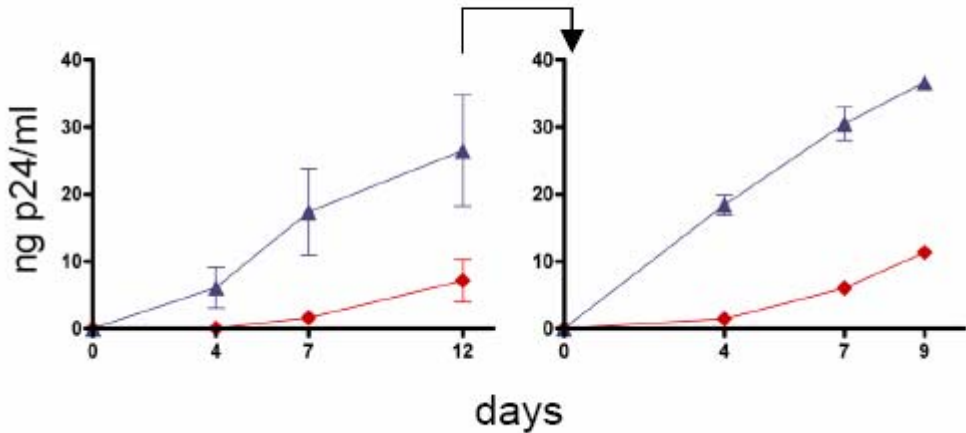

Supplement: pnas_0604493103_1.pdf [file pnas_0604493103_1.pdf]
